# Supplementary material for: The architecture of the adsorbed layer at the substrate interface determines the glass transition of supported ultrathin polystyrene films
Source: Royal Society of Chemistry journal article supplement (doi:10.1039/c6sm01500j), 2016-01-01
Supplement: c6sm01500j1.pdf [file c6sm01500j1.pdf]

*Supporting information for:*

## Architectures of the Adsorbed Layer at a Substrate Interface Determines the Glass Transition of Supported Ultrathin Polystyrene Films

*Shuzheng Sun, Hao Xu, Jun Han, Yumei Zhu, Biao Zuo, Xinping Wang\*, Wei Zhang*

Department of Chemistry, Key Laboratory of Advanced Textile Materials and Manufacturing Technology of the Education Ministry, Zhejiang Sci-Tech University, Hangzhou 310018, China.

\* Email: [wxinping@yahoo.com](mailto:wxinping@yahoo.com) (X. W) or [wxinping@zstu.edu.cn](mailto:wxinping@zstu.edu.cn) (X. W)

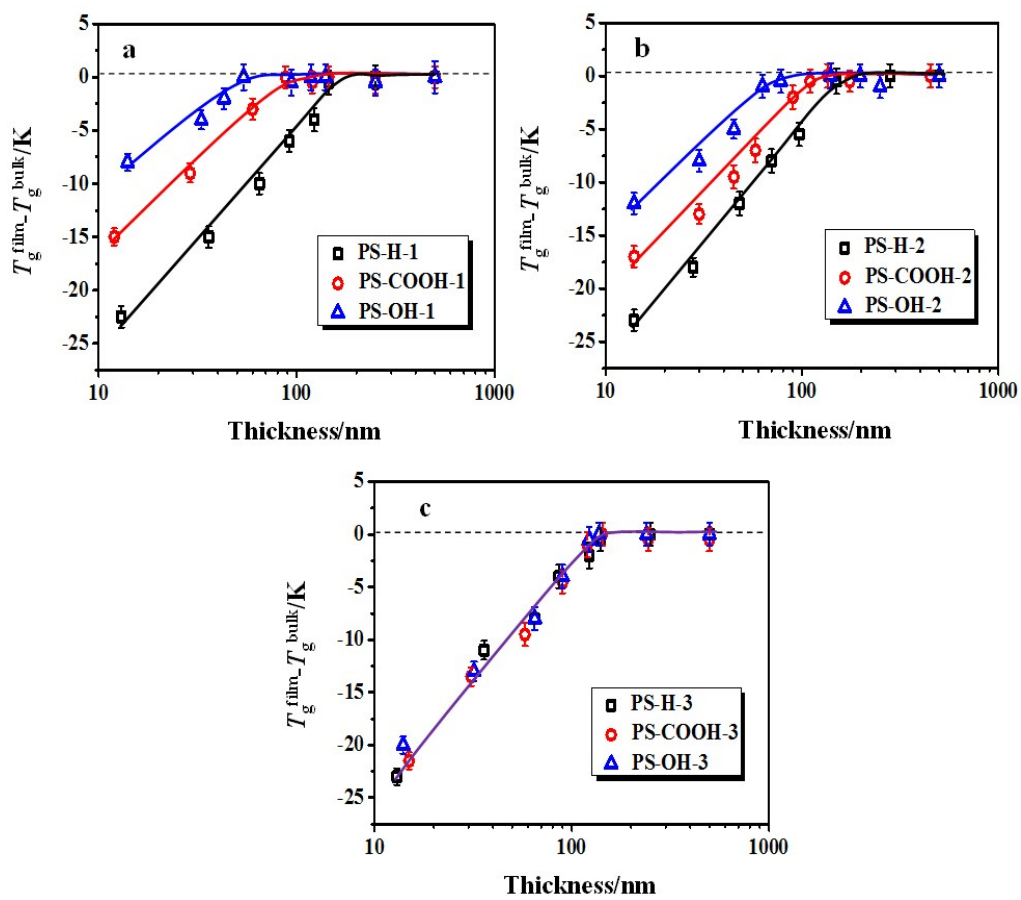

**Fig. S1**  $T_g^{\text{film}} - T_g^{\text{bulk}}$  vs thickness for thin films of PS with various chain end groups when the molecular weights were similar measured by dynamic wetting method.

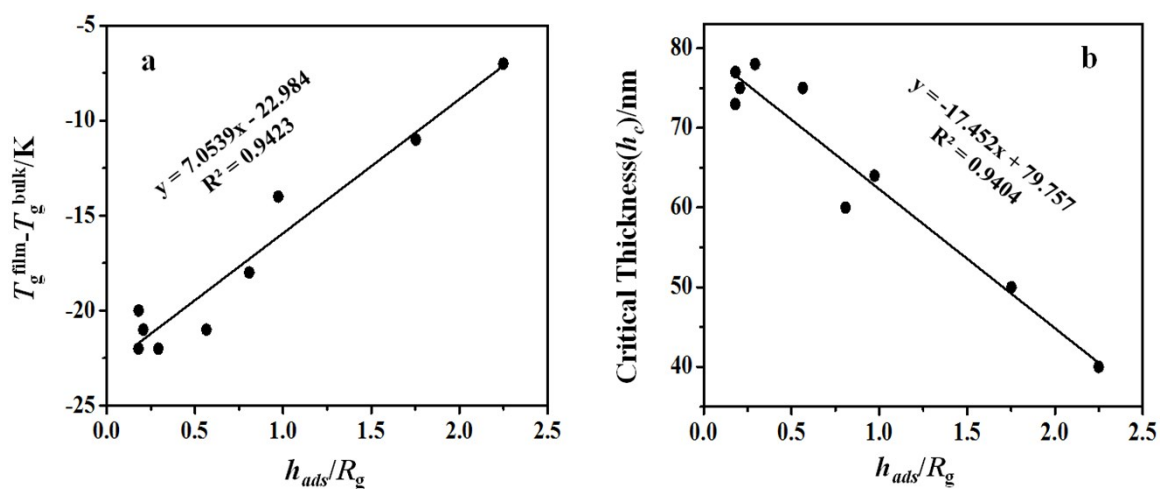

**Fig. S2**  $T_g^{film} - T_g^{bulk}$  (film thickness:  $15 \pm 1$  nm) (a) and critical thickness  $h_c$  (b) plotted as a function of  $h_{ads}/R_g$  for various PS films supported on SiO<sub>2</sub>-Si substrate.  $T_g$  of thin PS film was obtained by ellipsometry.

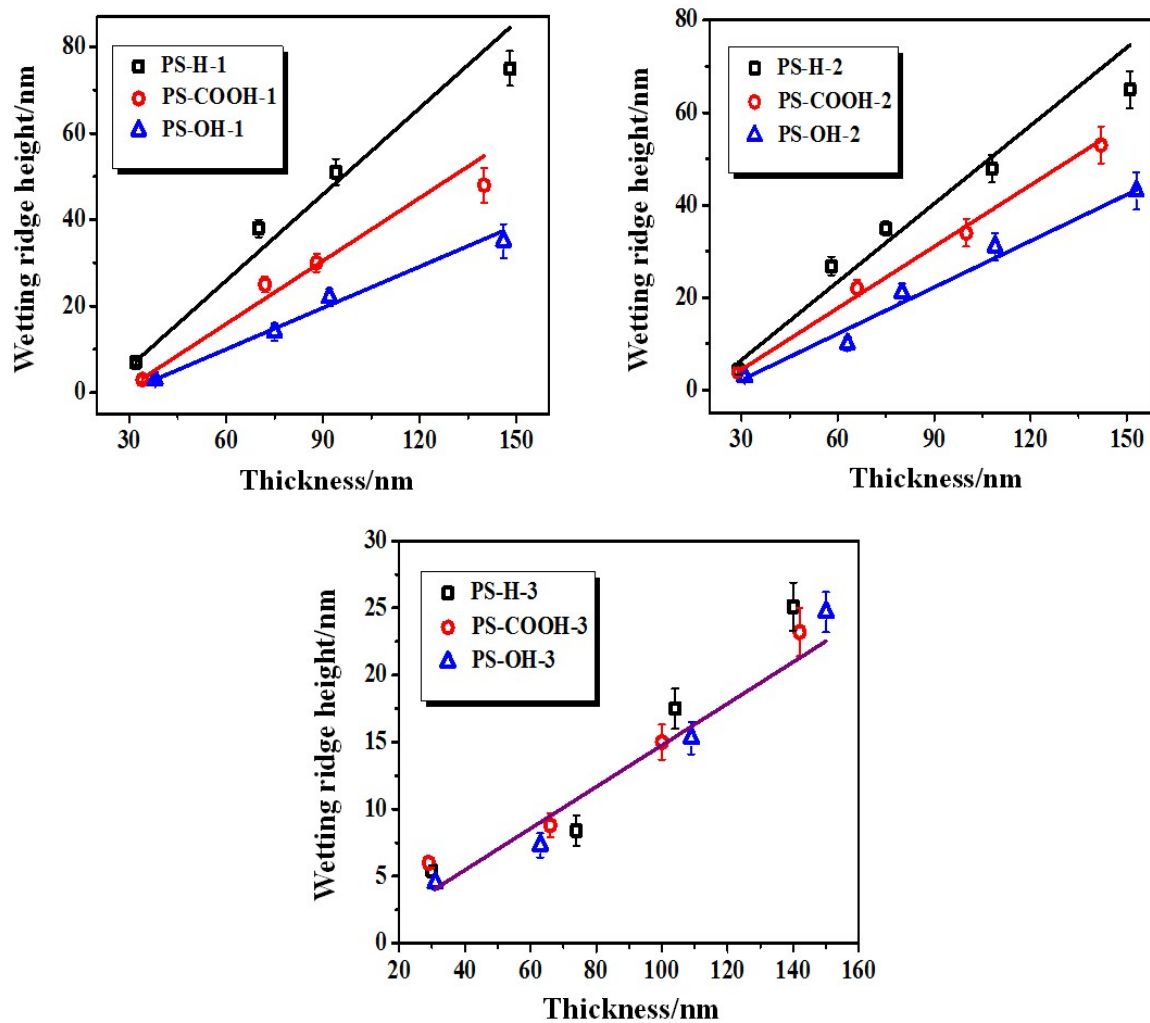

Fig. S3 Wetting ridge height plotted as a function of end-functional PS film thickness.

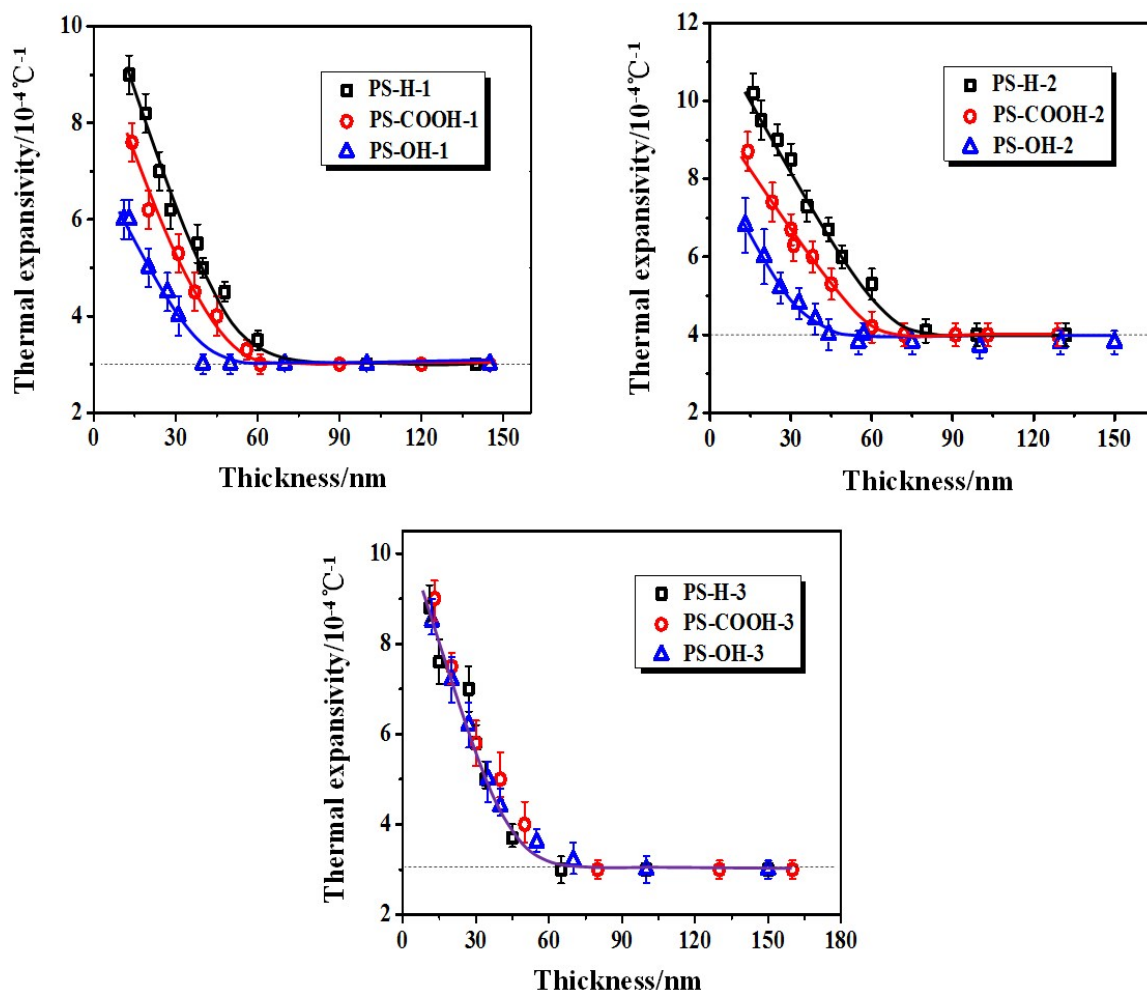

**Fig. S4** Thermal expansion coefficient (above  $T_g$ ) as a function of film thickness for various end-functional PS films measured by ellipsometry.
